# Supplementary material for: Development of a Gene Signature Associated with Iron Metabolism in Lung Adenocarcinoma
Source: Research Square preprint supplement (doi:10.21203/rs.3.rs-137635/v1), 2021-01-16
Supplement: Supplementary file 4 [file 5fbffa7ab18b9d989020f977.xlsx]

## Sheet: Sheet1
Table 2 Univariate Cox analysis results of TCGA cohort-46 candidate genes
Gene	HR	95% CI(low)	95% CI(high)	P value
AURKA	1.025	1.008	1.042	0.003
FBP1	0.993	0.988	0.998	0.004
MKI67	1.045	1.021	1.069	<0.001
CYP4B1	0.994	0.989	0.998	0.005
HAVCR1	1.133	1.071	1.199	<0.001
FEN1	1.028	1.011	1.046	0.001
CYP27A1	0.984	0.973	0.996	0.007
MCM4	1.019	1.006	1.033	0.003
RRM2	1.026	1.012	1.04	<0.001
ITGB4	1.006	1.002	1.01	0.004
VIPR1	0.839	0.753	0.936	0.002
ENO1	1.002	1.001	1.002	<0.001
INHA	1.008	1.003	1.014	0.004
HSPD1	1.006	1.003	1.009	<0.001
ADRB2	0.785	0.673	0.914	0.002
PFKP	1.009	1.004	1.013	<0.001
TK1	1.009	1.003	1.014	0.002
CCNB1	1.019	1.009	1.029	<0.001
TXNRD1	1.002	1.001	1.004	0.001
PLOD2	1.013	1.007	1.02	<0.001
MAD2L1	1.05	1.012	1.09	0.009
SPN	0.896	0.831	0.966	0.004
BIRC5	1.023	1.008	1.038	0.003
KRT19	1.001	1	1.001	0.004
GAPDH	1.001	1	1.001	<0.001
KPNA2	1.012	1.006	1.017	<0.001
ANGPTL4	1.009	1.004	1.013	<0.001
CCNA2	1.034	1.016	1.052	<0.001
PRSS3	1.024	1.009	1.04	0.002
KRT8	1.001	1.001	1.002	<0.001
LDHA	1.005	1.003	1.006	<0.001
HMMR	1.075	1.041	1.11	<0.001
ABCC2	1.019	1.007	1.031	0.001
CDKN3	1.039	1.013	1.066	0.003
SLC2A1	1.01	1.007	1.012	<0.001
FOXM1	1.035	1.017	1.053	<0.001
SCN4B	0.763	0.63	0.923	0.005
NT5E	1.009	1.002	1.016	0.008
DLC1	0.96	0.932	0.99	0.009
IGFBP3	1.003	1.001	1.004	0.002
CYP24A1	1.003	1.002	1.005	<0.001
LOXL2	1.02	1.014	1.027	<0.001
TIMP1	1.001	1	1.002	0.001
ALDOA	1.002	1.001	1.003	0.002
PTPRH	1.036	1.012	1.061	0.003
TPX2	1.011	1.004	1.019	0.001
HR= Hazard ratio CI= confidence interval
