# Supplementary material for: Development of a Gene Signature Associated with Iron Metabolism in Lung Adenocarcinoma
Source: Research Square preprint supplement (doi:10.21203/rs.3.rs-137635/v1), 2021-01-16
Supplement: Supplementary file 5 [file 8b5f102d190e52ac00b5b4a0.xlsx]

## Sheet: Sheet1
Table 3 Univariate and multivariate Cox analysis of the 12-gene prognostic signature and clinical risk factors
Variables	Univariate analysis			Multivariate analysis
Training set
id	HR	HR (95% CI)	p-value	HR	HR (95% CI)	p-value
Age	0.997	0.978-1.015	0.718	1.014	0.994−1.035	0.16
Gender	1	0.694-1.441	1	0.85	0.585−1.235	0.394
Stage	1.648	1.396-1.946	<0.001	1.921	1.154−3.198	0.012
T	1.6	1.285-1.994	<0.001	1.009	0.785−1.296	0.946
M	1.748	0.959-3.187	0.068	0.368	0.095−1.423	0.147
N	1.787	1.455-2.195	<0.001	0.943	0.603−1.476	0.798
Risk Score	3.982	2.867-5.530	<0.001	3.313	2.273−4.827	<0.001
Test set
id	HR	HR (95% CI)	p-value	HR	HR (95% CI)	p-value
Age	1.01	0.977−1.044	0.561	0.985	0.950−1.021	0.407
Gender	1.905	0.994−3.650	0.052	1.23	0.616−2.454	0.557
Stage	1.652	1.144−2.387	0.007	1.568	1.052−2.337	0.027
RiskScore	82.97	10.025−686.710	<0.001	84.063	7.882−896.502	<0.001
HR: Hazard ratio; CI:confidence interval; T: Tumor; M: Metastasis; N: Node.
