# Supplementary material for: Development of a Gene Signature Associated with Iron Metabolism in Lung Adenocarcinoma
Source: Research Square preprint supplement (doi:10.21203/rs.3.rs-137635/v1), 2021-01-16
Supplement: Supplementary file 6 [file ff9da7cb6615c4a5ba62e981.xlsx]

## Sheet: Sheet1
Table 1 Clinical characteristics of the lung cancer patients used in this study
Features	TCGA (n, %)	GSE42127 (n, %)
Platform	Illumina HiSeq	Illumina HumanWG-6 v3 Array
≤ 60years	156 (32.1%)	22 (16.8%)
> 60years	330 (67.9%)	109 (83.2%)
NA	0 (0.0%)	0 (0.0%)
Male	225 (46.3%)	67(51.1%)
Female	261 (53.7%)	64 (48.9%)
NA	0 (0.0%)	0 (0.0%)
StageI	258 (53.1%)	87(66.4%)
StageII	116 (23.9%)	22(16.8%)
StageIII	79 (16.3%)	20(15.3%)
StageIV	25 (5.1%)	1 (0.75%)
NA	8 (1.6%)	1 (0.75%)
T1	163 (33.5%)	123 (93.9%)
T2	259 (53.3%)	7 (5.35%)
T3	43 (8.9%)	0 (0.0%)
T4	18 (3.7%)	0 (0.0%)
TX	3 (0.6%)	1(0.75%)
NA	0(0.0%)	0(0.0%)
N0	312 (64.2%)	一
N1	93 (19.1%)	一
N2	68 (14.0%)	一
N3	2(0.4%)	一
N4	0(0.0%)	一
NX	10 (2.1%)	一
NA	1(0.2%）	一
M0	322 (66.3%)	一
M1	24 (4.9%)	一
MX	136 (28.0%)	一
NA	4 (0.8%)	一
Alive	328 (67.5%)	90 (68.7%)
Dead	158 (32.5%)	41 (31.3%)
